# Supplementary material
Source: MDPI journal article supplement (https://www.mdpi.com/1999-4907/10/4/344)
Supplement: s1 [file s1]

1 **Supplementary Materials:**

2 **Table S1.** Review of national REDD+ documents for keywords.

| Country         | National REDD+ documents                                                                                                                 | Mention of biodiversity | Mention of forest fauna in relation to REDD+ | Mention of hunting in relation to REDD+ |
|-----------------|------------------------------------------------------------------------------------------------------------------------------------------|-------------------------|----------------------------------------------|-----------------------------------------|
| <b>Colombia</b> | UN-REDD - Colombia National Programme Document 2015                                                                                      | yes                     | no                                           | no                                      |
|                 | UN-REDD - Colombia 2017; Third National Communication of Colombia to the UNFCCC                                                          | yes                     | no                                           | no                                      |
|                 | UN-REDD 2018 - Successes, Lessons learnt and challenges ( <i>in Spanish</i> )                                                            | yes                     | no                                           | no                                      |
|                 | MADS 2017. Second summary of information of safeguards for REDD+ In Colombia ( <i>in Spanish</i> )                                       | yes                     | no                                           | no                                      |
|                 | MADS 2017. Forests territories of life. Integrated strategy for the control of deforestation and forest management ( <i>in Spanish</i> ) | yes                     | no                                           | no                                      |
|                 | FCPF 2018. Readiness Fund REDD+ Country Participant Progress Report Template ( <i>in Spanish</i> )                                       | yes                     | no                                           | no                                      |
|                 | FCPF - Annual Country Progress Reporting 2017                                                                                            | yes                     | no                                           | no                                      |
| <b>Ecuador</b>  | UN-REDD 2011 - National Programme Document - Ecuador                                                                                     | yes                     | no                                           | no                                      |
|                 | UN-REDD - Ecuador National Programme Report 2015                                                                                         | yes                     | no                                           | no                                      |
|                 | Green Climate Fund 2018 - Ecuador REDD+ Results Based Payments for Results                                                               | yes                     | no                                           | no                                      |

|                  |                                                                                                                         |     |     |     |
|------------------|-------------------------------------------------------------------------------------------------------------------------|-----|-----|-----|
|                  | Period 2014, Environmental and Social Management Framework                                                              |     |     |     |
|                  | MAE 2017. Definition of the national approach and scope of REDD+ safeguards: lessons learned by Ecuador                 | yes | no  | no  |
|                  | MAE 2016. Bosques para el Buen Vivir - Plan de Acción REDD+ Ecuador (2016-2025).                                        | yes | yes | no  |
|                  | MAE 2017. First summary of information on approach and respect of safeguards for REDD+ in Ecuador ( <i>in Spanish</i> ) | yes | no  | no  |
| <b>Indonesia</b> | REDD+ National Strategy Indonesian REDD+ Task Force June 2012                                                           | yes | no  | no  |
|                  | FCPF 2017: REDD+ Readiness Self-Assessment for Indonesia Submitted to the Forest Carbon Partnership Facility (FCPF)     | yes | no  | no  |
|                  | FCPF 2016. Annual country report                                                                                        | yes | no  | no  |
|                  | FCPF 2018. Readiness Fund REDD+ Country Participant Progress Report Template                                            | yes | no  | no  |
|                  | GDCC and MEF 2015. Safeguard Information System for REDD+ in Indonesia                                                  | yes | yes | no  |
|                  | UN-REDD 2012. National REDD+ strategy Indonesia                                                                         | yes | yes | no  |
| <b>Nigeria</b>   | UN-REDD National Programme Annual Report 2015                                                                           | no  | no  | no  |
|                  | REDD+ Readiness Preparation Proposal (R-PP), 2014 (FCPF & UNREDD)                                                       | yes | no  | yes |
|                  | FCPF - Annual country report 2016                                                                                       | yes | no  | no  |

|                   |                                                                                                                                           |     |    |    |
|-------------------|-------------------------------------------------------------------------------------------------------------------------------------------|-----|----|----|
|                   | FCPF 2018. Readiness Fund REDD+ Country Participant Progress Report Template                                                              | no  | no | no |
|                   | FCPF 2017 - Mid-term Progress Report Nigeria                                                                                              | yes | no | no |
| <b>Tanzania</b>   | FCPF 2017 - Annual country report                                                                                                         | yes | no | no |
|                   | FCPF 2010 - Tanzania Readiness Preparation Proposal                                                                                       | yes | no | no |
|                   | World Bank 2010. Participatory forest management and REDD+ in Tanzania                                                                    | yes | no | no |
|                   | URT 2010. Forest Carbon Partnership Facility (FCPF) - Tanzania readiness preparation proposal                                             | yes | no | no |
|                   | URT 2012. National Strategy For Reduced Emissions From Deforestation And Forest Degradation                                               | yes | no | no |
|                   | UN-REDD 2013. Final evaluation of the UN-REDD Tanzania national programme                                                                 | yes | no | no |
|                   | UNEP 2013. Tanzania methodological brief                                                                                                  | yes | no | no |
|                   | URT 2013. Action plan for implementation of the national strategy for reduced emissions from deforestation and forest degradation (REDD+) | yes | no | no |
|                   | URT 2013. National strategy for reduced emissions from deforestation and forest degradation (REDD+)                                       | yes | no | no |
| <b>Argentina</b>  | National Action Plan for Forests and Climate Change 2017                                                                                  | yes | no | no |
| <b>Bangladesh</b> | UN-REDD Bangladesh National Programme 2015                                                                                                | no  | no | no |

|                  |                                                                                                  |     |     |     |
|------------------|--------------------------------------------------------------------------------------------------|-----|-----|-----|
| Bolivia          | National Programme Document 2010 ( <i>in Spanish</i> )                                           | yes | yes | no  |
| Brazil           | National REDD+ Strategy 2016                                                                     | yes | no  | no  |
| Cambodia         | National REDD+ Strategy 2017                                                                     | yes | no  | no  |
| Congo            | UNREDD National Programme Document 2012 ( <i>in French</i> )                                     | no  | no  | no  |
| Cote d'Ivoire    | National Programme Document 2014 ( <i>in French</i> )                                            | no  | no  | no  |
| DRC              | Stratégie-Cadre Nationale REDD+ de la République Démocratique du Congo 2017 ( <i>in French</i> ) | yes | no  | yes |
| Malaysia         | National REDD+ Strategy 2016                                                                     | yes | no  | no  |
| Mexico           | National REDD+ Strategy 2017 ( <i>in Spanish</i> )                                               | yes | no  | no  |
| Peru             | Peru National Strategy on Forests & Climate Change 2016 ( <i>in Spanish</i> )                    | yes | yes | no  |
| Philippines      | The Philippine National REDD-plus Strategy 2010                                                  | yes | no  | no  |
| Papua New Guinea | National REDD+ Strategy 2017                                                                     | yes | no  | no  |
| Solomon Islands  | UN-REDD National Programme Document 2011                                                         | no  | no  | no  |
| Viet Nam         | UN-REDD Viet Nam Phase II Programme 2013                                                         | yes | no  | no  |

Note: \*hunting was mentioned in some instances as a livelihood strategy, and in the Tanzanian national strategy for reduced emissions from deforestation and forest degradation (REDD+) (URT 2013) only in relation to forest fires started by hunters. These mentions were not included in this table as they do not directly refer to hunting from a REDD+ implementation or biodiversity conservation perspective. We grouped the keywords in the following way: biodiversity (including biological diversity and biodiv\*), fauna (including wildlife, animal\*, defaun\* and depletion), hunting (including hunt\*, meat\*, poach\* and bushmeat).

**Table S2.** List of all sub-national REDD+ projects assessed listed in the international database on REDD+ projects and programs (reddprojectdatabase.org), the Verra project database and the Plan Vivo list of projects for registered and ongoing sub-national REDD+ projects in Colombia, Indonesia and Tanzania (excluding reforestation and afforestation projects and those projects for which no documents were available). No ongoing projects with available documentation were found for Ecuador and Nigeria.

| Colombia                                          |                                                                                  |                                                                    |                                                                |                                                         |
|---------------------------------------------------|----------------------------------------------------------------------------------|--------------------------------------------------------------------|----------------------------------------------------------------|---------------------------------------------------------|
| Project Name                                      | REDD+ Project<br>Resguardo Indígena<br>Unificado Selva de<br>Mataven             | Concosta REDD+ Project                                             | ACAPA - Bajo Mira y<br>Frontera (ACAPA - BMF)<br>REDD+ Project | The Chocó-Darién Conservation Corridor<br>REDD Project, |
| Year Implemented                                  | 2014                                                                             | 2014                                                               | 2013                                                           | started 2010, VCS 2012                                  |
| Status                                            | VCS Registered Project                                                           | VCS Registered, CCB validation<br>approved                         | VCS Registered, CCB<br>validation approved                     | VCS Registered, CCB validation approved                 |
| Emission<br>Reductions (tons<br>estimated annual) | 3,622,352                                                                        | 333, 978                                                           | 404,786                                                        | 80,938                                                  |
| Implementing<br>Organization                      | Multiple                                                                         | Consejo Comunitario de<br>Concosta; developed by<br>BIOREDD+/USAID | BioREDD+ / USAID                                               | Anthrotect S.A.S.                                       |
| Project Validator                                 | Colombian Institute for<br>Technical Standards<br>and Certification<br>(ICONTEC) | Rainforest Alliance, Inc.                                          | Rainforest Alliance, Inc.                                      | DNV - Den Norske Veritas Climate<br>Change Services     |
| Target Area                                       | Orinoco Region,<br>Vichada                                                       | Pacific Coast, Choco,                                              | Pacific Coast, Nariño                                          | Choco, Pacific Coast                                    |

|                                                     |                                                                                                                         |                                                                                                                                                                                                                                         |                                                                                                                                                                                                                                             |                                                                                                                                                                                                                                                   |
|-----------------------------------------------------|-------------------------------------------------------------------------------------------------------------------------|-----------------------------------------------------------------------------------------------------------------------------------------------------------------------------------------------------------------------------------------|---------------------------------------------------------------------------------------------------------------------------------------------------------------------------------------------------------------------------------------------|---------------------------------------------------------------------------------------------------------------------------------------------------------------------------------------------------------------------------------------------------|
| Mention of hunting / fauna / wildlife               | Yes                                                                                                                     | Yes                                                                                                                                                                                                                                     | Yes                                                                                                                                                                                                                                         | Yes                                                                                                                                                                                                                                               |
| How mentioned                                       | In relation to local activities and use of forest resources                                                             | In relation to current overuse and implications of hunting for HCV of area; including social aspects of hunting and role of regulation for sustainable hunting                                                                          |                                                                                                                                                                                                                                             | Important local activity and important to maintain for local people's connection to forest                                                                                                                                                        |
| Mentioned in relation to impacts on forest / carbon | No                                                                                                                      | <b>Yes</b> - improved connectivity that project area forests provide with adjacent and nearby ecosystems and the potential or climate adaptation benefits through improved seed dispersal (PDD Concosta p. 278; PDD ACAPA – MBF p. 206) |                                                                                                                                                                                                                                             | <b>Yes</b> - key to maintain forest structure and composition and to guarantee habitat connectivity to maintain the area's biodiversity and rare ecosystems. Project should aim to eliminate hunting of large to medium size mammals (PDD, p 64.) |
| Mention of wildlife in relation to monitoring       | No                                                                                                                      | <b>Yes</b> - to be included in on the ground monitoring (species identification, etc.)                                                                                                                                                  | <b>Yes</b> - ongoing monitoring will include the assessment of hunting trends through scheduled consultation with hunters and other stakeholders. Wildlife transects scheduled as a component of the project's monitoring plan (PDD p. 214) | <b>Yes</b> - including hunting, and monitoring of fauna (birds and beetles)                                                                                                                                                                       |
| Link to documents                                   | <a href="http://vcsprojectdatabase.org/#/project_details/1566">http://vcsprojectdatabase.org/#/project_details/1566</a> | <a href="http://vcsprojectdatabase.org/#/project_details/1400">http://vcsprojectdatabase.org/#/project_details/1400</a>                                                                                                                 | <a href="http://vcsprojectdatabase.org/#/project_details/1389">http://vcsprojectdatabase.org/#/project_details/1389</a>                                                                                                                     | <a href="http://vcsprojectdatabase.org/#/project_details/856">http://vcsprojectdatabase.org/#/project_details/856</a>                                                                                                                             |
| Colombia                                            |                                                                                                                         |                                                                                                                                                                                                                                         |                                                                                                                                                                                                                                             |                                                                                                                                                                                                                                                   |

|                                             |                                                           |                                                                                                                                                                  |                                                           |                                                                                                                                                                                             |
|---------------------------------------------|-----------------------------------------------------------|------------------------------------------------------------------------------------------------------------------------------------------------------------------|-----------------------------------------------------------|---------------------------------------------------------------------------------------------------------------------------------------------------------------------------------------------|
| Project Name                                | Mutatá REDD+ Project                                      | Sivirú-Usaragá-Pizarro-Pilizá (SUPP) REDD+                                                                                                                       | Rio Pepe y ACABA REDD+ Project                            | Cajambre REDD+ Project                                                                                                                                                                      |
| Year Implementation                         | 2013                                                      | 2013                                                                                                                                                             | 2014                                                      | 2013                                                                                                                                                                                        |
| Status                                      | VCS Registered, CCB validation approved                   | VCS Registered, CCB validation approved                                                                                                                          | VCS Registered, CCB validation approved                   | VCS Registered, CCB validation approved                                                                                                                                                     |
| Emission Reductions (tons estimated annual) | 156,476                                                   | 312,078                                                                                                                                                          | 224,05                                                    | 297,488                                                                                                                                                                                     |
| Implementing Organization                   | Cabildo Mayor Indigena de Mutatá                          | BIOREDD+ / USAID                                                                                                                                                 | BIOREDD+ / USAID                                          | BIOREDD+ / USAID                                                                                                                                                                            |
| Project Validator                           | Rainforest Alliance, Inc.                                 | Rainforest Alliance, Inc.                                                                                                                                        | Rainforest Alliance, Inc.                                 | Rainforest Alliance, Inc.                                                                                                                                                                   |
| Target Area                                 | Antioquia and Choco department                            | Choco department                                                                                                                                                 | Choco department                                          | Valle del Cauca department                                                                                                                                                                  |
| Mention of hunting / fauna / wildlife       | Yes                                                       | Yes                                                                                                                                                              | Yes                                                       | Yes                                                                                                                                                                                         |
| How mentioned                               | Importance for local people's food provision (PDD, p. 66) | Dependence of local communities on forests resources due to isolation from mainstream market supply of these resources and the high poverty levels. (PDD, p. 53) | Importance for local people's food provision (PDD, p. 70) | Hunting of birds and mammals represents an important economic activity for the community, primarily for subsistence. Deer and peccary species can also be sold for their skins. (PDD, p.34) |

|                                                     |                                                                                                                                                                                                                                                                                                                                                                                                                                                                                                                                                                                                                      |                                                                                                                                      |                                                                                                                                                 |                                                                                                                                           |
|-----------------------------------------------------|----------------------------------------------------------------------------------------------------------------------------------------------------------------------------------------------------------------------------------------------------------------------------------------------------------------------------------------------------------------------------------------------------------------------------------------------------------------------------------------------------------------------------------------------------------------------------------------------------------------------|--------------------------------------------------------------------------------------------------------------------------------------|-------------------------------------------------------------------------------------------------------------------------------------------------|-------------------------------------------------------------------------------------------------------------------------------------------|
| Mentioned in relation to impacts on forest / carbon | Yes - improvements to the amount of intact and partially intact forest vegetation cover also support the continuation of functional biodiversity attributes including ecosystem productivity and nutrient cycling, water purification and reduced erosion, and reduced vulnerability to invasive species. They also improve landscape connectivity which contributes to processes including seed dispersion, reproduction, gene flow and associated capacity to adapt to climate change (PDD Mutatá, p. 206; PDD SUPP REDD+, p. 224; PDD Rio Pepe y ACABA REDD+ Project, p. 198; PDD Cajambre REDD+ Project, p. 214) |                                                                                                                                      |                                                                                                                                                 |                                                                                                                                           |
| Mention of wildlife in relation to monitoring       | Yes - patrols will be put in place, and local community members will receive training in HCV monitoring, including species identification, data collection and reporting methodology (PDD Mutatá REDD+ Project, p. 193; PDD SUPP REDD+, p. 210; PDD Rio Pepe y ACABA REDD+ Project, p. 185; PDD Cajambre REDD+ Project, p. 199)                                                                                                                                                                                                                                                                                      |                                                                                                                                      |                                                                                                                                                 |                                                                                                                                           |
| Link to documents                                   | PDD 2015 - <a href="https://vcsprojectdatabase.org/#/ccb-all-project-details/1399">https://vcsprojectdatabase.org/#/ccb-all-project-details/1399</a>                                                                                                                                                                                                                                                                                                                                                                                                                                                                 | PDD 2015 - <a href="https://vcsprojectdatabase.org/#/project_details/1391">https://vcsprojectdatabase.org/#/project_details/1391</a> | PDD - <a href="https://vcsprojectdatabase.org/#/ccb-all-project-details/1396">https://vcsprojectdatabase.org/#/ccb-all-project-details/1396</a> | <a href="https://vcsprojectdatabase.org/#/ccb-all-project-details/1392">https://vcsprojectdatabase.org/#/ccb-all-project-details/1392</a> |
| <b>Colombia</b>                                     |                                                                                                                                                                                                                                                                                                                                                                                                                                                                                                                                                                                                                      |                                                                                                                                      |                                                                                                                                                 |                                                                                                                                           |
| Project Name                                        | Carmen del Darien                                                                                                                                                                                                                                                                                                                                                                                                                                                                                                                                                                                                    |                                                                                                                                      | Bajo Calima y Bahía Málaga (BCBM)                                                                                                               |                                                                                                                                           |
| Year Implementation                                 | 2014                                                                                                                                                                                                                                                                                                                                                                                                                                                                                                                                                                                                                 |                                                                                                                                      | 2013                                                                                                                                            |                                                                                                                                           |
| Status                                              | VCS Registered, CCB validation approved                                                                                                                                                                                                                                                                                                                                                                                                                                                                                                                                                                              |                                                                                                                                      | VCS Registered, CCB validation approved                                                                                                         |                                                                                                                                           |
| Emission Reductions (estimated annual)              | 462,19                                                                                                                                                                                                                                                                                                                                                                                                                                                                                                                                                                                                               |                                                                                                                                      | 498,719                                                                                                                                         |                                                                                                                                           |
| Implementing Organization                           | BIOREDD+ / USAID                                                                                                                                                                                                                                                                                                                                                                                                                                                                                                                                                                                                     |                                                                                                                                      | BioREDD+ / USAID                                                                                                                                |                                                                                                                                           |
| Project Validator                                   | Rainforest Alliance, Inc.                                                                                                                                                                                                                                                                                                                                                                                                                                                                                                                                                                                            |                                                                                                                                      | Rainforest Alliance, Inc.                                                                                                                       |                                                                                                                                           |
| Target Area                                         | Choco department                                                                                                                                                                                                                                                                                                                                                                                                                                                                                                                                                                                                     |                                                                                                                                      | Valle del Cauca department                                                                                                                      |                                                                                                                                           |



|                                                     |                                                                                                                                                                                                                                                                                                                                                                                                                                                                                                                                                                                                                                                                                                                                                                                                                                                                                                   |                                                                                                                                                                                                                                                                 |
|-----------------------------------------------------|---------------------------------------------------------------------------------------------------------------------------------------------------------------------------------------------------------------------------------------------------------------------------------------------------------------------------------------------------------------------------------------------------------------------------------------------------------------------------------------------------------------------------------------------------------------------------------------------------------------------------------------------------------------------------------------------------------------------------------------------------------------------------------------------------------------------------------------------------------------------------------------------------|-----------------------------------------------------------------------------------------------------------------------------------------------------------------------------------------------------------------------------------------------------------------|
| Mention of hunting / fauna / wildlife               | Yes                                                                                                                                                                                                                                                                                                                                                                                                                                                                                                                                                                                                                                                                                                                                                                                                                                                                                               | Yes                                                                                                                                                                                                                                                             |
| How mentioned                                       | Hunting is an important livelihood and food source for local people (PDD Carmen del Darien, p. 39; PDD BCBM, p. 35)                                                                                                                                                                                                                                                                                                                                                                                                                                                                                                                                                                                                                                                                                                                                                                               |                                                                                                                                                                                                                                                                 |
| Mentioned in relation to impacts on forest / carbon | <b>Yes</b> - Improvements to the amount of intact and partially intact forest vegetation cover also support the continuation of functional biodiversity attributes including ecosystem productivity and nutrient cycling, water purification and reduced erosion, and reduced vulnerability to invasive species. They also improve landscape connectivity which contributes to processes including seed dispersion, reproduction, gene flow and associated capacity to adapt to climate change (PDD Carmen del Darien, p. 200; PDD BCBM, p. 226)                                                                                                                                                                                                                                                                                                                                                  |                                                                                                                                                                                                                                                                 |
| Mention of wildlife in relation to monitoring       | <p><b>Yes</b> - Restrictions will be placed on hunting and fishing, allowing for only seasonal, local and non-commercial harvesting of species. Patrols will be put in place, and local community members will receive training in HCV monitoring, including species identification, data collection and reporting methodology (PDD Carmen del Darien, p. 186; PDD BCBM, p. 211)</p> <p>Ongoing monitoring will include the assessment of hunting trends through scheduled consultation with hunters and other stakeholders. Wildlife transects scheduled as a component of the project's monitoring plan will build existing knowledge of invertebrate population levels and form a basis from which to being monitoring future trends, and help further distinguish specific species groupings that are practical and relevant to monitor (PDD Carmen del Darien, p. 207; PDD BCBM, p. 235)</p> |                                                                                                                                                                                                                                                                 |
| Link to documents                                   | <a href="https://vcsprojectdatabase.org/#/ccb-all-project-details/1390">https://vcsprojectdatabase.org/#/ccb-all-project-details/1390</a>                                                                                                                                                                                                                                                                                                                                                                                                                                                                                                                                                                                                                                                                                                                                                         | <a href="https://vcsprojectdatabase.org/#/ccb-all-project-details/1395">https://vcsprojectdatabase.org/#/ccb-all-project-details/1395</a>                                                                                                                       |
| <b>Indonesia</b>                                    |                                                                                                                                                                                                                                                                                                                                                                                                                                                                                                                                                                                                                                                                                                                                                                                                                                                                                                   |                                                                                                                                                                                                                                                                 |
| Project Name                                        | Mangrove restoration and coastal greenbelt protection in the East coast of Aceh and North Sumatra Province, Indonesia                                                                                                                                                                                                                                                                                                                                                                                                                                                                                                                                                                                                                                                                                                                                                                             | Katingan Peatland Restoration and Conservation Project, Indonesia<br><br>Rimba Raya Biodiversity Reserve Project, Indonesia<br><br>Bujang Raba Community PES project<br><br>Community Forests for Climate, People, and Wildlife Hutan Desa Durian Rambun, Jambi |

| Year Implemented                            | 2015                                                   | 2016                                                                                                                                                             | 2011                                                                                                        | 2013                                                                                                                                                         | 2014                                                                                                                             |
|---------------------------------------------|--------------------------------------------------------|------------------------------------------------------------------------------------------------------------------------------------------------------------------|-------------------------------------------------------------------------------------------------------------|--------------------------------------------------------------------------------------------------------------------------------------------------------------|----------------------------------------------------------------------------------------------------------------------------------|
| Status                                      | VCS Registered                                         | VCS Registered, CCB validation approved                                                                                                                          | VCS Registered, CCB validation approved                                                                     | Plan Vivo registered and certified                                                                                                                           | Plan Vivo registered and certified                                                                                               |
| Emission Reductions (tons estimated annual) | 124,706                                                | 7,451,846                                                                                                                                                        | 3,527,171                                                                                                   | 40,000                                                                                                                                                       | 25,697                                                                                                                           |
| Implementing Organization                   | Livelihoods Fund                                       | PT. Rimba Makmur Utama (PT. RMU)                                                                                                                                 | InfiniteEARTH                                                                                               | KKi Warsi                                                                                                                                                    | Fauna & Flora International                                                                                                      |
| Project Validator                           | SCS Global Services                                    | SCS Global Services                                                                                                                                              | SCS Global Services                                                                                         | Plan Vivo                                                                                                                                                    | Plan Vivo                                                                                                                        |
| Target Area                                 | North-East coast of Aceh province, Indonesia.          | Katingan and Kotawaring districts in Timur in Central Kalimantan Province                                                                                        | Southern coast of Borneo in the province of Central Kalimantan                                              | Jambi Province, Central Sumatra                                                                                                                              | Jambi Province, Central Sumatra                                                                                                  |
| Mention of hunting / fauna / wildlife       | Yes                                                    | Yes                                                                                                                                                              | Yes                                                                                                         | Yes                                                                                                                                                          | Yes                                                                                                                              |
| How mentioned                               | Protected areas with wildlife included in project area | Human-induced risks to the project's biodiversity benefits, related to hunting pressure, typically focused on a narrow range of species. Activities specifically | The majority of communities are Muslim, and generally hunt a smaller set of animals and at lower intensity. | Improve habitat quality and quantity – place restrictions on hunting of endangered species and establish a monitoring system to track changes in populations | Hunting is only mentioned in relation to poaching and fauna only in relation to forests being important habitat for local fauna. |

|                                                     |    |                                                                                                                                                                                                                                                                                                                                                                                                           |                                                                                                                                                                                                                                                                                                                                            |                                                                                     |                                                                                    |
|-----------------------------------------------------|----|-----------------------------------------------------------------------------------------------------------------------------------------------------------------------------------------------------------------------------------------------------------------------------------------------------------------------------------------------------------------------------------------------------------|--------------------------------------------------------------------------------------------------------------------------------------------------------------------------------------------------------------------------------------------------------------------------------------------------------------------------------------------|-------------------------------------------------------------------------------------|------------------------------------------------------------------------------------|
|                                                     |    | <p>aimed at reducing hunting pressure on key species include monitoring of hunting impacts to enable sustainable use, creation of alternative livelihoods for those reliant on hunting incomes, and increased protection, patrolling and enforcement to reduce and prevent the exploitation of endangered and/or legally protected species. Reviews hunting threats to threatened species in the area</p> | <p>Unsustainable hunting by resident worker populations and capture of songbirds for the commercial pet trade.</p> <p>The project does not dissuade or prevent normal community land uses, such as local level wood collection, hunting, fishing, use of agricultural lands. Some species in the area has suffered severe overhunting.</p> |                                                                                     |                                                                                    |
| Mentioned in relation to impacts on forest / carbon | No | No                                                                                                                                                                                                                                                                                                                                                                                                        | No                                                                                                                                                                                                                                                                                                                                         | No                                                                                  | No                                                                                 |
| Mention of wildlife in relation to monitoring       | No | <p><b>Yes</b> - Surveys of hunting effort and animals targeted conducted. Unclear to what extent</p>                                                                                                                                                                                                                                                                                                      | <p><b>Yes</b> - Monitoring is carried out through annual surveys of indicator species for</p>                                                                                                                                                                                                                                              | <p><b>Yes</b> - The project will establish a monitoring system to track changes</p> | <p><b>Yes</b> - Regular forest patrols will provide checks on illegal logging,</p> |

|  |  |                                                                            |                                                                        |                                                                                                                                                                                                                                                                                                                                                                                                                                                                                    |                                                                                                                                                                               |
|--|--|----------------------------------------------------------------------------|------------------------------------------------------------------------|------------------------------------------------------------------------------------------------------------------------------------------------------------------------------------------------------------------------------------------------------------------------------------------------------------------------------------------------------------------------------------------------------------------------------------------------------------------------------------|-------------------------------------------------------------------------------------------------------------------------------------------------------------------------------|
|  |  | wildlife populations are monitored because list of variables not included. | plants, birds, mammals, and herpetofauna. Special focus on orangutans. | resulting from project activities and establishing conservation strategies and hunting bans on any endangered or threatened species.<br><br>Biodiversity will be tracked through the monitoring of apex species like the endangered Sumatran tiger. Camera traps will be installed with the number of individuals in the protected area assessed annually. Other indicator species will also be tracked including observations of larger primates, hornbills, bears, and leopards. | encroachment, fire, and biodiversity monitoring (including encounter rates of high conservation value species, e.g., Sumatran tiger,) and threats to species, e.g., poaching. |
|--|--|----------------------------------------------------------------------------|------------------------------------------------------------------------|------------------------------------------------------------------------------------------------------------------------------------------------------------------------------------------------------------------------------------------------------------------------------------------------------------------------------------------------------------------------------------------------------------------------------------------------------------------------------------|-------------------------------------------------------------------------------------------------------------------------------------------------------------------------------|

|                                             |                                                                                                                                                                                                                                                      |                                                                                                                                   |                                                                                                                                                                                                                         |                                                                                                                         |                                                                                                                                                 |
|---------------------------------------------|------------------------------------------------------------------------------------------------------------------------------------------------------------------------------------------------------------------------------------------------------|-----------------------------------------------------------------------------------------------------------------------------------|-------------------------------------------------------------------------------------------------------------------------------------------------------------------------------------------------------------------------|-------------------------------------------------------------------------------------------------------------------------|-------------------------------------------------------------------------------------------------------------------------------------------------|
| Link documents to                           | <a href="https://www.vcsprojectdatabase.org/#/project_details/1493">https://www.vcsprojectdatabase.org/#/project_details/1493</a>                                                                                                                    | <a href="https://www.vcsprojectdatabase.org/#/project_details/1477">https://www.vcsprojectdatabase.org/#/project_details/1477</a> | <a href="https://www.vcsprojectdatabase.org/#/project_details/674">https://www.vcsprojectdatabase.org/#/project_details/674</a>                                                                                         | <a href="http://www.planvivo.org/project-network/bujang-raba/">http://www.planvivo.org/project-network/bujang-raba/</a> | <a href="http://www.planvivo.org/project-network/durian-rambun-indonesia/">http://www.planvivo.org/project-network/durian-rambun-indonesia/</a> |
| <b>Tanzania</b>                             |                                                                                                                                                                                                                                                      |                                                                                                                                   |                                                                                                                                                                                                                         |                                                                                                                         |                                                                                                                                                 |
| Project Name                                | Mjumita Community Forest Project (Lindi), Tanzania                                                                                                                                                                                                   |                                                                                                                                   | REDD+ in Yaeda Valley                                                                                                                                                                                                   |                                                                                                                         |                                                                                                                                                 |
| Year Implemented                            | 2014                                                                                                                                                                                                                                                 |                                                                                                                                   | 2012                                                                                                                                                                                                                    |                                                                                                                         |                                                                                                                                                 |
| Status                                      | VCS registered, CCB validation approved                                                                                                                                                                                                              |                                                                                                                                   | Plan Vivo registered and certified                                                                                                                                                                                      |                                                                                                                         |                                                                                                                                                 |
| Emission Reductions (tons estimated annual) | 46,263                                                                                                                                                                                                                                               |                                                                                                                                   | 18,012                                                                                                                                                                                                                  |                                                                                                                         |                                                                                                                                                 |
| Implementing Organization                   | Multiple                                                                                                                                                                                                                                             |                                                                                                                                   | Carbon Tanzania                                                                                                                                                                                                         |                                                                                                                         |                                                                                                                                                 |
| Project Validator                           | SCS Global Services                                                                                                                                                                                                                                  |                                                                                                                                   | Plan Vivo                                                                                                                                                                                                               |                                                                                                                         |                                                                                                                                                 |
| Target Area                                 | Rural Lindi region                                                                                                                                                                                                                                   |                                                                                                                                   | Mongo wa Mono, Domanga & Yaeda Chini villages (Northern Tanzania)                                                                                                                                                       |                                                                                                                         |                                                                                                                                                 |
| Mention of hunting / fauna / wildlife       | Yes                                                                                                                                                                                                                                                  |                                                                                                                                   | Yes                                                                                                                                                                                                                     |                                                                                                                         |                                                                                                                                                 |
| How mentioned                               | Illegal hunting for bushmeat is conducted in all villages. Increase in human-wildlife conflict associated with increase in forest cover and forest enhancement. Training on strategies to reduce crop-losses by control of problem animals. Capacity |                                                                                                                                   | This project area contains high biodiversity by protecting the traditional land of the Hadzabe and Barabaig, this project simultaneously improves the habitat of the wildlife species native to the project area and by |                                                                                                                         |                                                                                                                                                 |

|                                                     |                                                                                                                                                                                                                                                                                                                                                                                                                       |                                                                                                                                                                                                                                                                       |
|-----------------------------------------------------|-----------------------------------------------------------------------------------------------------------------------------------------------------------------------------------------------------------------------------------------------------------------------------------------------------------------------------------------------------------------------------------------------------------------------|-----------------------------------------------------------------------------------------------------------------------------------------------------------------------------------------------------------------------------------------------------------------------|
|                                                     | constraints for wildlife tourism. Maintain ecosystem service delivery to local communities by ensuring sustainable use.                                                                                                                                                                                                                                                                                               | reducing impacts of illegal poaching protects enigmatic megafauna present in the area.<br>Fauna is referred to as essential seed disperses and pollinators in these environments, without further specification                                                       |
| Mentioned in relation to impacts on forest / carbon | No                                                                                                                                                                                                                                                                                                                                                                                                                    | Partly                                                                                                                                                                                                                                                                |
| Mention of wildlife in relation to monitoring       | <b>No</b> - Develop and implement a monitoring plan that identifies biodiversity variables to be monitored, the areas to be monitored, the sampling methods, and the frequency of monitoring and reporting. Monitoring variables must be directly linked to the project's biodiversity objectives and to predicted activities, outcomes and impacts identified in the project's causal model related to biodiversity. | <b>Yes</b> – protecting the traditional land of the Hadza and Barabaig through patrolling, the project simultaneously improves the habitat of the wildlife species native to the project area and prevents poaching, but no monitoring plan or species are presented. |
| Link to documents                                   | <a href="https://www.vcsprojectdatabase.org/#/project_details/1325">https://www.vcsprojectdatabase.org/#/project_details/1325</a>                                                                                                                                                                                                                                                                                     | <a href="http://www.planvivo.org/project-network/redd-in-yaeda-valley-tanzania/">http://www.planvivo.org/project-network/redd-in-yaeda-valley-tanzania/</a>                                                                                                           |

13  
14  
15
